# Supplementary material
Source: publisher site journal article supplement (http://www.degruyter.com/publication/journal_key/OPAR/downloadAsset/OPAR_CFP%20Human%20Plant%20Interactions.pdf)
Supplement: Supplementary file 1 [file OPAR_CFP%20Human%20Plant%20Interactions.pdf]

# Can You See Me? Putting the 'Human' Back Into 'Human-Plant' Interactions

## COORDINATING EDITORS

---

María Martín-Seijo, Universidad de Cantabria, Spain

Dawn Elise Mooney, University of Stavanger, Norway

Marian Berihuete Azorín, Universitat Autònoma de Barcelona, Spain

María Laura Ciampagna, CONICET, Argentina

## DESCRIPTION

---

*Open Archaeology* invites manuscripts for the Special Issue: *Can You See Me? Putting the 'Human' Back Into 'Human-Plant' Interactions*.

Environmental archaeology has undergone significant development and consolidation in recent decades, integrating a growing variety of proxies. Our knowledge about past landscapes and plant exploitation has greatly expanded. It is time now to go further and reintegrate humans as research subjects in archaeological and archaeobotanical studies of human-environment or human-plant interactions. Archaeological discussions generally acknowledge the traces left by humans on the landscape, and their botanical knowledge, skills, and technological know-how – but the agency of individuals and communities is often poorly integrated in these narratives. Although we acknowledge the difficulties inherent to this approach when studying plant remains from the archaeological record, it is crucial at this point to reflect on the **HUMAN DIMENSION OF PEOPLE-PLANT INTERACTIONS**. In this sense, the main aim of this session is to present works that combine studies of plant exploitation with more human perspectives, in order to open a discussion on the possibilities and limitations of this approach and explore the current state of the art. We welcome contributions on practical and theoretical approaches from archaeobotany, anthropology, ethnoarchaeology and experimental archaeology dealing with this topic.

## HOW TO SUBMIT

---

The authors are kindly invited to submit their contribution via the online submission system Editorial Manager available at:

<http://www.editorialmanager.com/opar/Default.aspx>

Please select the Category “**Human-Plant Interactions**” to ensure that the manuscript is processed by the Guest Editors.

It is important that authors include a cover letter with their manuscript. The cover letter should explicitly state that the manuscript (or one with substantially the same content, by any of the authors) has not been previously published in any language anywhere and that it is not under simultaneous consideration or in press by another journal.



# Can You See Me? Putting the 'Human' Back Into 'Human-Plant' Interactions

Before submission the authors should carefully read over the Instructions for Authors, which are located at:

[www.degruyter.com/publication/journal\\_key/OPAR/downloadAsset/OPAR\\_Instructions%20for%20Authors.pdf](http://www.degruyter.com/publication/journal_key/OPAR/downloadAsset/OPAR_Instructions%20for%20Authors.pdf)

There are no specific length restrictions for the overall manuscript or individual sections; however, we urge the authors to present and discuss their findings in a concise and accessible manner. We recommend a length of 8,000-10,000 words, excluding the bibliography and figure captions.

Submission of a manuscript does not necessarily imply approval for its publication in this *Open Archaeology* special issue. The manuscript will be subjected to a peer review procedure managed by our esteemed Guest Editors and its acceptance will depend on this assessment.

*Open Archaeology* applies Article Publishing Charges ([APC](#)), to cover costs of publication in open access. There is no submission fee.

We invite you to submit manuscripts until **15 October 2023**. If you have any questions, please contact Marian Berihuete Azorín ([Marian.Berihuete@uab.cat](mailto:Marian.Berihuete@uab.cat)) or Katarzyna Inga Michalak ([katarzyna.michalak@degruyter.com](mailto:katarzyna.michalak@degruyter.com)).
